# Supplementary material for: A Meta-Analysis Reveals the Commonalities and Differences in Arabidopsis thaliana Response to Different Viral Pathogens
Source: PLoS One. 2012 Jul 12;7(7):e40526. doi: 10.1371/journal.pone.0040526 (PMC3395709; doi:10.1371/journal.pone.0040526)
Supplement: File S2 — Over-represented GO terms (up/down) for all viral infections and those GO terms shared by pairs of viruses. In addition, we provide the similarity matrix. (XLS) [file pone.0040526.s019.xls]

## Sheet: Sheet1
TEV up		TEV down		TEV-At17 up		TEV-At17 down		TuMV up		TuMV down		PPV up		PPV down		TMV up		TMV down		TRV up		TRV down		TCV up		TCV down		CaLCuV up		CaLCuV down
GO:0009737	response_to_abscisic_acid_stimulus	GO:0006066	alcohol_metabolic_process	GO:0009617	response_to_bacterium	GO:0006725	cellular_aromatic_compound_metabolic_process	GO:0006457	protein_folding	GO:0006631	fatty_acid_metabolic_process	GO:0000271	polysaccharide_biosynthetic_process	GO:0019722	calcium-mediated_signaling	GO:0006970	response_to_osmotic_stress	none	none	GO:0009627	systemic_acquired_resistance	GO:0006066	alcohol_metabolic_process	GO:0019725	cellular_homeostasis	GO:0006631	fatty_acid_metabolic_process	GO:0006955	immune_response	GO:0000302	response_to_reactive_oxygen_species
GO:0006970	response_to_osmotic_stress	GO:0008610	lipid_biosynthetic_process	GO:0010038	response_to_metal_ion	GO:0009698	phenylpropanoid_metabolic_process	GO:0006979	response_to_oxidative_stress	GO:0006633	fatty_acid_biosynthetic_process	GO:0005976	polysaccharide_metabolic_process	GO:0019725	cellular_homeostasis	GO:0006979	response_to_oxidative_stress			GO:0051707	response_to_other_organism	GO:0006725	cellular_aromatic_compound_metabolic_process	GO:0045454	cell_redox_homeostasis	GO:0006633	fatty_acid_biosynthetic_process	GO:0009605	response_to_external_stimulus	GO:0006979	response_to_oxidative_stress
GO:0009266	response_to_temperature_stimulus	GO:0009733	response_to_auxin_stimulus	GO:0046686	response_to_cadmium_ion	GO:0019748	secondary_metabolic_process	GO:0009266	response_to_temperature_stimulus	GO:0006869	lipid_transport	GO:0006073	cellular_glucan_metabolic_process	GO:0045454	cell_redox_homeostasis	GO:0009651	response_to_salt_stress			GO:0009617	response_to_bacterium	GO:0009617	response_to_bacterium	GO:0006839	mitochondrial_transport	GO:0006644	phospholipid_metabolic_process	GO:0009627	systemic_acquired_resistance	GO:0019725	cellular_homeostasis
GO:0009409	response_to_cold	GO:0010189	vitamin_E_biosynthetic_process	GO:0051707	response_to_other_organism	GO:0006520	cellular_amino_acid_metabolic_process	GO:0009408	response_to_heat	GO:0006970	response_to_osmotic_stress	GO:0006970	response_to_osmotic_stress	GO:0009642	response_to_light_intensity	GO:0006520	cellular_amino_acid_metabolic_process			GO:0006032	chitin_catabolic_process	GO:0019748	secondary_metabolic_process	GO:0006520	cellular_amino_acid_metabolic_process	GO:0008610	lipid_biosynthetic_process	GO:0009814	defense_response,_incompatible_interaction	GO:0045454	cell_redox_homeostasis
GO:0009642	response_to_light_intensity	GO:0042362	fat-soluble_vitamin_biosynthetic_process	GO:0009407	toxin_catabolic_process	GO:0022900	electron_transport_chain	GO:0009617	response_to_bacterium	GO:0009737	response_to_abscisic_acid_stimulus	GO:0009250	glucan_biosynthetic_process	GO:0006979	response_to_oxidative_stress	GO:0008652	cellular_amino_acid_biosynthetic_process			GO:0016052	carbohydrate_catabolic_process	GO:0042742	defense_response_to_bacterium	GO:0006790	sulfur_metabolic_process	GO:0008654	phospholipid_biosynthetic_process	GO:0045087	innate_immune_response	GO:0010038	response_to_metal_ion
GO:0009651	response_to_salt_stress	GO:0006725	cellular_aromatic_compound_metabolic_process	GO:0009636	response_to_toxin	GO:0045454	cell_redox_homeostasis	GO:0009642	response_to_light_intensity	GO:0010166	wax_metabolic_process	GO:0009266	response_to_temperature_stimulus	GO:0009743	response_to_carbohydrate_stimulus	GO:0006790	sulfur_metabolic_process			GO:0010038	response_to_metal_ion	GO:0051707	response_to_other_organism	GO:0009620	response_to_fungus	GO:0010166	wax_metabolic_process	GO:0051707	response_to_other_organism	GO:0010039	response_to_iron_ion
GO:0006955	immune_response	GO:0009314	response_to_radiation	GO:0019748	secondary_metabolic_process	GO:0006721	terpenoid_metabolic_process	GO:0010038	response_to_metal_ion	GO:0019748	secondary_metabolic_process	GO:0009408	response_to_heat	GO:0010200	response_to_chitin	GO:0009267	cellular_response_to_starvation			GO:0046686	response_to_cadmium_ion	GO:0006520	cellular_amino_acid_metabolic_process	GO:0042398	cellular_amino_acid_derivative_biosynthetic_process	GO:0009314	response_to_radiation	GO:0006979	response_to_oxidative_stress	GO:0015979	photosynthesis
GO:0045087	innate_immune_response	GO:0009416	response_to_light_stimulus	GO:0006979	response_to_oxidative_stress	GO:0008299	isoprenoid_biosynthetic_process	GO:0046686	response_to_cadmium_ion	GO:0015979	photosynthesis	GO:0009651	response_to_salt_stress	GO:0001539	ciliary_or_flagellar_motility	GO:0009605	response_to_external_stimulus			GO:0009850	auxin_metabolic_process	GO:0043039	tRNA_aminoacylation	GO:0051707	response_to_other_organism	GO:0009416	response_to_light_stimulus	GO:0016052	carbohydrate_catabolic_process	GO:0006612	protein_targeting_to_membrane
GO:0051707	response_to_other_organism	GO:0009698	phenylpropanoid_metabolic_process	GO:0009737	response_to_abscisic_acid_stimulus	GO:0008610	lipid_biosynthetic_process	GO:0051707	response_to_other_organism	GO:0009414	response_to_water_deprivation	GO:0016051	carbohydrate_biosynthetic_process			GO:0009970	cellular_response_to_sulfate_starvation			GO:0006006	glucose_metabolic_process	GO:0009657	plastid_organization	GO:0006970	response_to_osmotic_stress	GO:0009605	response_to_external_stimulus	GO:0009266	response_to_temperature_stimulus	GO:0045036	protein_targeting_to_chloroplast
GO:0009723	response_to_ethylene_stimulus	GO:0019748	secondary_metabolic_process	GO:0016051	carbohydrate_biosynthetic_process	GO:0016114	terpenoid_biosynthetic_process	GO:0019725	cellular_homeostasis	GO:0009415	response_to_water	GO:0051707	response_to_other_organism			GO:0010038	response_to_metal_ion			GO:0006007	glucose_catabolic_process	GO:0008610	lipid_biosynthetic_process	GO:0009651	response_to_salt_stress	GO:0009637	response_to_blue_light	GO:0009636	response_to_toxin	GO:0005976	polysaccharide_metabolic_process
GO:0009873	ethylene_mediated_signaling_pathway	GO:0009637	response_to_blue_light	GO:0019725	cellular_homeostasis	GO:0016116	carotenoid_metabolic_process	GO:0042254	ribosome_biogenesis	GO:0000103	sulfate_assimilation	GO:0009314	response_to_radiation			GO:0016052	carbohydrate_catabolic_process			GO:0019320	hexose_catabolic_process	GO:0010038	response_to_metal_ion	GO:0009723	response_to_ethylene_stimulus	GO:0009639	response_to_red_or_far_red_light	GO:0019748	secondary_metabolic_process	GO:0006073	cellular_glucan_metabolic_process
GO:0006979	response_to_oxidative_stress	GO:0009765	photosynthesis,_light_harvesting	GO:0030003	cellular_cation_homeostasis	GO:0009314	response_to_radiation	GO:0006364	rRNA_processing	GO:0006109	regulation_of_carbohydrate_metabolic_process	GO:0009409	response_to_cold			GO:0019748	secondary_metabolic_process			GO:0009266	response_to_temperature_stimulus	GO:0046686	response_to_cadmium_ion	GO:0009737	response_to_abscisic_acid_stimulus	GO:0006779	porphyrin_biosynthetic_process	GO:0006970	response_to_osmotic_stress	GO:0007047	cellular_cell_wall_organization
GO:0009620	response_to_fungus	GO:0010114	response_to_red_light	GO:0009314	response_to_radiation	GO:0009416	response_to_light_stimulus	GO:0006396	RNA_processing	GO:0006790	sulfur_metabolic_process	GO:0009416	response_to_light_stimulus			GO:0046686	response_to_cadmium_ion			GO:0006916	anti-apoptosis	GO:0006457	protein_folding	GO:0009739	response_to_gibberellin_stimulus	GO:0033014	tetrapyrrole_biosynthetic_process	GO:0009617	response_to_bacterium	GO:0009250	glucan_biosynthetic_process
GO:0050832	defense_response_to_fungus	GO:0015979	photosynthesis	GO:0009416	response_to_light_stimulus	GO:0009639	response_to_red_or_far_red_light	GO:0006413	translational_initiation	GO:0016051	carbohydrate_biosynthetic_process	GO:0009311	oligosaccharide_metabolic_process			GO:0006417	regulation_of_translation			GO:0043066	negative_regulation_of_apoptosis	GO:0009658	chloroplast_organization	GO:0009751	response_to_salicylic_acid_stimulus	GO:0009266	response_to_temperature_stimulus	GO:0009651	response_to_salt_stress	GO:0009832	plant-type_cell_wall_biogenesis
GO:0009626	plant-type_hypersensitive_response	GO:0019684	photosynthesis,_light_reaction	GO:0009605	response_to_external_stimulus	GO:0010114	response_to_red_light	GO:0006970	response_to_osmotic_stress	GO:0019760	glucosinolate_metabolic_process	GO:0009312	oligosaccharide_biosynthetic_process			GO:0009266	response_to_temperature_stimulus					GO:0010020	chloroplast_fission	GO:0009753	response_to_jasmonic_acid_stimulus	GO:0009409	response_to_cold	GO:0010038	response_to_metal_ion	GO:0016051	carbohydrate_biosynthetic_process
GO:0009753	response_to_jasmonic_acid_stimulus	GO:0006721	terpenoid_metabolic_process	GO:0009642	response_to_light_intensity	GO:0009737	response_to_abscisic_acid_stimulus	GO:0009651	response_to_salt_stress	GO:0009605	response_to_external_stimulus	GO:0050826	response_to_freezing			GO:0009314	response_to_radiation					GO:0043572	plastid_fission	GO:0010038	response_to_metal_ion	GO:0022900	electron_transport_chain	GO:0042742	defense_response_to_bacterium	GO:0030244	cellulose_biosynthetic_process
GO:0031347	regulation_of_defense_response	GO:0008299	isoprenoid_biosynthetic_process	GO:0006970	response_to_osmotic_stress	GO:0007169	transmembrane_receptor_protein_tyrosine_kinase_signaling_pathway	GO:0009627	systemic_acquired_resistance	GO:0009767	photosynthetic_electron_transport_chain	GO:0006066	alcohol_metabolic_process			GO:0009409	response_to_cold					GO:0010190	cytochrome_b6f_complex_assembly	GO:0046686	response_to_cadmium_ion	GO:0006461	protein_complex_assembly	GO:0046686	response_to_cadmium_ion	GO:0042546	cell_wall_biogenesis
GO:0031348	negative_regulation_of_defense_response	GO:0016114	terpenoid_biosynthetic_process	GO:0000302	response_to_reactive_oxygen_species	GO:0009733	response_to_auxin_stimulus	GO:0006605	protein_targeting	GO:0009773	photosynthetic_electron_transport_in_photosystem_I	GO:0006520	cellular_amino_acid_metabolic_process			GO:0009416	response_to_light_stimulus					GO:0006779	porphyrin_biosynthetic_process	GO:0006457	protein_folding	GO:0005976	polysaccharide_metabolic_process	GO:0007166	cell_surface_receptor_linked_signaling_pathway	GO:0006869	lipid_transport
GO:0034050	host_programmed_cell_death_induced_by_symbiont	GO:0009767	photosynthetic_electron_transport_chain	GO:0009266	response_to_temperature_stimulus	GO:0006779	porphyrin_biosynthetic_process	GO:0006626	protein_targeting_to_mitochondrion	GO:0019684	photosynthesis,_light_reaction	GO:0009908	flower_development			GO:0022900	electron_transport_chain					GO:0015994	chlorophyll_metabolic_process	GO:0007166	cell_surface_receptor_linked_signaling_pathway	GO:0009698	phenylpropanoid_metabolic_process	GO:0009620	response_to_fungus	GO:0009314	response_to_radiation
GO:0009605	response_to_external_stimulus	GO:0009773	photosynthetic_electron_transport_in_photosystem_I	GO:0009408	response_to_heat	GO:0015979	photosynthesis	GO:0007005	mitochondrion_organization	GO:0022900	electron_transport_chain	GO:0043039	tRNA_aminoacylation			GO:0032268	regulation_of_cellular_protein_metabolic_process					GO:0015995	chlorophyll_biosynthetic_process	GO:0007186	G-protein_coupled_receptor_protein_signaling_pathway	GO:0009699	phenylpropanoid_biosynthetic_process	GO:0019725	cellular_homeostasis	GO:0009416	response_to_light_stimulus
GO:0009611	response_to_wounding	GO:0009644	response_to_high_light_intensity	GO:0009644	response_to_high_light_intensity	GO:0015994	chlorophyll_metabolic_process	GO:0065002	intracellular_protein_transmembrane_transport	GO:0005982	starch_metabolic_process	GO:0007049	cell_cycle			GO:0051246	regulation_of_protein_metabolic_process					GO:0033014	tetrapyrrole_biosynthetic_process	GO:0009617	response_to_bacterium	GO:0009825	multidimensional_cell_growth	GO:0045454	cell_redox_homeostasis	GO:0009605	response_to_external_stimulus
GO:0009407	toxin_catabolic_process	GO:0006970	response_to_osmotic_stress	GO:0042542	response_to_hydrogen_peroxide	GO:0015995	chlorophyll_biosynthetic_process	GO:0009790	embryonic_development	GO:0005983	starch_catabolic_process	GO:0006304	DNA_modification			GO:0009414	response_to_water_deprivation					GO:0016042	lipid_catabolic_process	GO:0010193	response_to_ozone	GO:0016052	carbohydrate_catabolic_process	GO:0050832	defense_response_to_fungus	GO:0009637	response_to_blue_light
GO:0009617	response_to_bacterium	GO:0009651	response_to_salt_stress	GO:0009651	response_to_salt_stress	GO:0033014	tetrapyrrole_biosynthetic_process	GO:0009793	embryonic_development_ending_in_seed_dormancy	GO:0006073	cellular_glucan_metabolic_process	GO:0006306	DNA_methylation			GO:0009415	response_to_water					GO:0009698	phenylpropanoid_metabolic_process	GO:0042742	defense_response_to_bacterium	GO:0019748	secondary_metabolic_process	GO:0009751	response_to_salicylic_acid_stimulus	GO:0009638	phototropism
GO:0009636	response_to_toxin	GO:0009737	response_to_abscisic_acid_stimulus	GO:0042742	defense_response_to_bacterium	GO:0005976	polysaccharide_metabolic_process	GO:0010154	fruit_development	GO:0006972	hyperosmotic_response	GO:0006338	chromatin_remodeling			GO:0009753	response_to_jasmonic_acid_stimulus					GO:0009699	phenylpropanoid_biosynthetic_process	GO:0008652	cellular_amino_acid_biosynthetic_process	GO:0009617	response_to_bacterium	GO:0009314	response_to_radiation	GO:0009657	plastid_organization
GO:0042742	defense_response_to_bacterium	GO:0009063	cellular_amino_acid_catabolic_process	GO:0007568	aging	GO:0006073	cellular_glucan_metabolic_process	GO:0048316	seed_development	GO:0009266	response_to_temperature_stimulus	GO:0006730	one-carbon_metabolic_process			GO:0046500	S-adenosylmethionine_metabolic_process					GO:0009813	flavonoid_biosynthetic_process	GO:0008219	cell_death	GO:0015979	photosynthesis	GO:0009416	response_to_light_stimulus	GO:0009658	chloroplast_organization
GO:0009743	response_to_carbohydrate_stimulus	GO:0006631	fatty_acid_metabolic_process	GO:0009620	response_to_fungus	GO:0007047	cellular_cell_wall_organization	GO:0009409	response_to_cold	GO:0009409	response_to_cold	GO:0016568	chromatin_modification			GO:0006563	L-serine_metabolic_process					GO:0045036	protein_targeting_to_chloroplast	GO:0012501	programmed_cell_death	GO:0019684	photosynthesis,_light_reaction	GO:0000302	response_to_reactive_oxygen_species	GO:0018298	protein-chromophore_linkage
GO:0006972	hyperosmotic_response	GO:0009414	response_to_water_deprivation	GO:0050832	defense_response_to_fungus	GO:0009250	glucan_biosynthetic_process	GO:0016998	cell_wall_macromolecule_catabolic_process	GO:0042538	hyperosmotic_salinity_response	GO:0031507	heterochromatin_formation			GO:0009069	serine_family_amino_acid_metabolic_process							GO:0000160	two-component_signal_transduction_system_(phosphorelay)	GO:0042742	defense_response_to_bacterium	GO:0009611	response_to_wounding	GO:0006085	acetyl-CoA_biosynthetic_process
GO:0042538	hyperosmotic_salinity_response	GO:0009415	response_to_water	GO:0005976	polysaccharide_metabolic_process	GO:0016051	carbohydrate_biosynthetic_process	GO:0001539	ciliary_or_flagellar_motility	GO:0042335	cuticle_development	GO:0032259	methylation			GO:0000302	response_to_reactive_oxygen_species							GO:0009755	hormone-mediated_signaling_pathway	GO:0051707	response_to_other_organism	GO:0009753	response_to_jasmonic_acid_stimulus	GO:0042254	ribosome_biogenesis
GO:0009631	cold_acclimation	GO:0009738	abscisic_acid_mediated_signaling_pathway	GO:0009627	systemic_acquired_resistance	GO:0009653	anatomical_structure_morphogenesis	GO:0034976	response_to_endoplasmic_reticulum_stress	GO:0009631	cold_acclimation	GO:0051301	cell_division			GO:0009617	response_to_bacterium							GO:0009873	ethylene_mediated_signaling_pathway	GO:0006066	alcohol_metabolic_process	GO:0009615	response_to_virus	GO:0006970	response_to_osmotic_stress
GO:0010200	response_to_chitin	GO:0015977	carbon_fixation	GO:0001539	ciliary_or_flagellar_motility	GO:0030154	cell_differentiation			GO:0019252	starch_biosynthetic_process	GO:0010038	response_to_metal_ion			GO:0009867	jasmonic_acid_mediated_signaling_pathway							GO:0006955	immune_response	GO:0019318	hexose_metabolic_process	GO:0051607	defense_response_to_virus	GO:0009414	response_to_water_deprivation
GO:0001539	ciliary_or_flagellar_motility	GO:0016051	carbohydrate_biosynthetic_process	GO:0009743	response_to_carbohydrate_stimulus	GO:0000902	cell_morphogenesis					GO:0046686	response_to_cadmium_ion			GO:0042742	defense_response_to_bacterium							GO:0009605	response_to_external_stimulus	GO:0009765	photosynthesis,_light_harvesting	GO:0009743	response_to_carbohydrate_stimulus	GO:0009415	response_to_water
GO:0010193	response_to_ozone	GO:0019253	reductive_pentose-phosphate_cycle	GO:0042254	ribosome_biogenesis	GO:0008361	regulation_of_cell_size					GO:0006457	protein_folding			GO:0051707	response_to_other_organism							GO:0009611	response_to_wounding	GO:0015994	chlorophyll_metabolic_process	GO:0010200	response_to_chitin	GO:0009651	response_to_salt_stress
GO:0019722	calcium-mediated_signaling	GO:0019685	photosynthesis,_dark_reaction			GO:0009826	unidimensional_cell_growth					GO:0008544	epidermis_development			GO:0055085	transmembrane_transport							GO:0045727	positive_regulation_of_translation	GO:0015995	chlorophyll_biosynthetic_process	GO:0008219	cell_death	GO:0006631	fatty_acid_metabolic_process
GO:0051607	defense_response_to_virus	GO:0009827	plant-type_cell_wall_modification			GO:0016049	cell_growth					GO:0009606	tropism			GO:0015992	proton_transport							GO:0000302	response_to_reactive_oxygen_species	GO:0006352	transcription_initiation	GO:0012501	programmed_cell_death	GO:0006633	fatty_acid_biosynthetic_process
GO:0045727	positive_regulation_of_translation	GO:0009828	plant-type_cell_wall_loosening			GO:0048589	developmental_growth					GO:0009629	response_to_gravity			GO:0006800	oxygen_and_reactive_oxygen_species_metabolic_process							GO:0006979	response_to_oxidative_stress	GO:0010114	response_to_red_light	GO:0006915	apoptosis	GO:0008610	lipid_biosynthetic_process
		GO:0009250	glucan_biosynthetic_process			GO:0006813	potassium_ion_transport					GO:0009637	response_to_blue_light			GO:0042744	hydrogen_peroxide_catabolic_process							GO:0009411	response_to_UV	GO:0016042	lipid_catabolic_process	GO:0034976	response_to_endoplasmic_reticulum_stress	GO:0006520	cellular_amino_acid_metabolic_process
		GO:0005982	starch_metabolic_process			GO:0009699	phenylpropanoid_biosynthetic_process					GO:0009913	epidermal_cell_differentiation			GO:0009737	response_to_abscisic_acid_stimulus							GO:0006725	cellular_aromatic_compound_metabolic_process	GO:0006073	cellular_glucan_metabolic_process	GO:0010224	response_to_UV-B	GO:0008652	cellular_amino_acid_biosynthetic_process
		GO:0019252	starch_biosynthetic_process			GO:0042398	cellular_amino_acid_derivative_biosynthetic_process					GO:0022621	shoot_system_development			GO:0009853	photorespiration							GO:0019748	secondary_metabolic_process	GO:0007047	cellular_cell_wall_organization	GO:0030001	metal_ion_transport	GO:0009067	aspartate_family_amino_acid_biosynthetic_process
		GO:0006633	fatty_acid_biosynthetic_process			GO:0006066	alcohol_metabolic_process					GO:0030154	cell_differentiation			GO:0051260	protein_homooligomerization							GO:0019760	glucosinolate_metabolic_process	GO:0006520	cellular_amino_acid_metabolic_process	GO:0009863	salicylic_acid_mediated_signaling_pathway	GO:0019684	photosynthesis,_light_reaction
		GO:0006021	inositol_biosynthetic_process			GO:0009239	enterobactin_biosynthetic_process					GO:0048364	root_development			GO:0006006	glucose_metabolic_process							GO:0052386	cell_wall_thickening	GO:0006544	glycine_metabolic_process	GO:0031347	regulation_of_defense_response	GO:0022900	electron_transport_chain
		GO:0010166	wax_metabolic_process			GO:0043043	peptide_biosynthetic_process					GO:0048366	leaf_development			GO:0006007	glucose_catabolic_process							GO:0052542	callose_deposition_during_defense_response	GO:0006869	lipid_transport	GO:0006725	cellular_aromatic_compound_metabolic_process	GO:0043085	positive_regulation_of_catalytic_activity
						GO:0010075	regulation_of_meristem_growth					GO:0048367	shoot_development			GO:0006096	glycolysis							GO:0052543	callose_deposition_in_cell_wall	GO:0006006	glucose_metabolic_process	GO:0007568	aging	GO:0008361	regulation_of_cell_size
						GO:0035266	meristem_growth					GO:0048528	post-embryonic_root_development			GO:0019318	hexose_metabolic_process							GO:0052544	callose_deposition_in_cell_wall_during_defense_response	GO:0006007	glucose_catabolic_process	GO:0009699	phenylpropanoid_biosynthetic_process	GO:0009825	multidimensional_cell_growth
						GO:0040008	regulation_of_growth					GO:0048827	phyllome_development			GO:0019320	hexose_catabolic_process							GO:0009867	jasmonic_acid_mediated_signaling_pathway	GO:0006096	glycolysis	GO:0042398	cellular_amino_acid_derivative_biosynthetic_process	GO:0009827	plant-type_cell_wall_modification
						GO:0048638	regulation_of_developmental_growth					GO:0016192	vesicle-mediated_transport			GO:0006163	purine_nucleotide_metabolic_process							GO:0009626	plant-type_hypersensitive_response	GO:0019320	hexose_catabolic_process	GO:0006623	protein_targeting_to_vacuole	GO:0006461	protein_complex_assembly
						GO:0009664	plant-type_cell_wall_organization					GO:0005985	sucrose_metabolic_process			GO:0006164	purine_nucleotide_biosynthetic_process							GO:0009627	systemic_acquired_resistance	GO:0009753	response_to_jasmonic_acid_stimulus	GO:0006457	protein_folding	GO:0006972	hyperosmotic_response
						GO:0015977	carbon_fixation					GO:0005986	sucrose_biosynthetic_process			GO:0009117	nucleotide_metabolic_process							GO:0009814	defense_response,_incompatible_interaction	GO:0009767	photosynthetic_electron_transport_chain	GO:0009696	salicylic_acid_metabolic_process	GO:0009266	response_to_temperature_stimulus
						GO:0019253	reductive_pentose-phosphate_cycle					GO:0009415	response_to_water			GO:0009165	nucleotide_biosynthetic_process							GO:0031347	regulation_of_defense_response	GO:0009773	photosynthetic_electron_transport_in_photosystem_I	GO:0009697	salicylic_acid_biosynthetic_process	GO:0009409	response_to_cold
						GO:0019685	photosynthesis,_dark_reaction					GO:0006396	RNA_processing			GO:0009259	ribonucleotide_metabolic_process							GO:0034050	host_programmed_cell_death_induced_by_symbiont	GO:0010218	response_to_far_red_light	GO:0009816	defense_response_to_bacterium,_incompatible_interaction	GO:0042538	hyperosmotic_salinity_response
						GO:0009266	response_to_temperature_stimulus					GO:0006397	mRNA_processing			GO:0009269	response_to_desiccation							GO:0045087	innate_immune_response	GO:0009853	photorespiration	GO:0019318	hexose_metabolic_process	GO:0006457	protein_folding
						GO:0009409	response_to_cold					GO:0008284	positive_regulation_of_cell_proliferation			GO:0009765	photosynthesis,_light_harvesting							GO:0050832	defense_response_to_fungus	GO:0006949	syncytium_formation	GO:0006007	glucose_catabolic_process	GO:0009639	response_to_red_or_far_red_light
						GO:0007623	circadian_rhythm					GO:0008380	RNA_splicing			GO:0015979	photosynthesis							GO:0034976	response_to_endoplasmic_reticulum_stress	GO:0009306	protein_secretion	GO:0019320	hexose_catabolic_process	GO:0010114	response_to_red_light
						GO:0009414	response_to_water_deprivation					GO:0016071	mRNA_metabolic_process			GO:0019684	photosynthesis,_light_reaction							GO:0043067	regulation_of_programmed_cell_death	GO:0009664	plant-type_cell_wall_organization	GO:0009408	response_to_heat	GO:0009411	response_to_UV
						GO:0009415	response_to_water					GO:0042127	regulation_of_cell_proliferation			GO:0009767	photosynthetic_electron_transport_chain							GO:0009862	systemic_acquired_resistance,_salicylic_acid_mediated_signaling_pathway	GO:0009827	plant-type_cell_wall_modification	GO:0007049	cell_cycle	GO:0016116	carotenoid_metabolic_process
						GO:0009640	photomorphogenesis					GO:0009653	anatomical_structure_morphogenesis			GO:0006623	protein_targeting_to_vacuole							GO:0009863	salicylic_acid_mediated_signaling_pathway	GO:0009828	plant-type_cell_wall_loosening	GO:0006665	sphingolipid_metabolic_process	GO:0019748	secondary_metabolic_process
						GO:0009755	hormone-mediated_signaling_pathway					GO:0048507	meristem_development			GO:0006896	Golgi_to_vacuole_transport							GO:0009266	response_to_temperature_stimulus	GO:0042545	cell_wall_modification	GO:0006816	calcium_ion_transport	GO:0009116	nucleoside_metabolic_process
						GO:0009739	response_to_gibberellin_stimulus					GO:0009657	plastid_organization			GO:0048193	Golgi_vesicle_transport							GO:0009409	response_to_cold	GO:0042547	cell_wall_modification_involved_in_multidimensional_cell_growth	GO:0009117	nucleotide_metabolic_process	GO:0046686	response_to_cadmium_ion
						GO:0006631	fatty_acid_metabolic_process					GO:0009658	chloroplast_organization			GO:0006631	fatty_acid_metabolic_process							GO:0009414	response_to_water_deprivation	GO:0048589	developmental_growth	GO:0000304	response_to_singlet_oxygen	GO:0009269	response_to_desiccation
						GO:0016042	lipid_catabolic_process					GO:0016052	carbohydrate_catabolic_process			GO:0006891	intra-Golgi_vesicle-mediated_transport							GO:0009415	response_to_water	GO:0015977	carbon_fixation	GO:0031348	negative_regulation_of_defense_response	GO:0009611	response_to_wounding
						GO:0009605	response_to_external_stimulus					GO:0008652	cellular_amino_acid_biosynthetic_process			GO:0018298	protein-chromophore_linkage							GO:0009743	response_to_carbohydrate_stimulus	GO:0019253	reductive_pentose-phosphate_cycle	GO:0009062	fatty_acid_catabolic_process	GO:0009642	response_to_light_intensity
						GO:0006949	syncytium_formation					GO:0009067	aspartate_family_amino_acid_biosynthetic_process			GO:0006108	malate_metabolic_process							GO:0010200	response_to_chitin	GO:0019685	photosynthesis,_dark_reaction	GO:0019395	fatty_acid_oxidation	GO:0009644	response_to_high_light_intensity
						GO:0009306	protein_secretion					GO:0009624	response_to_nematode			GO:0045727	positive_regulation_of_translation							GO:0009636	response_to_toxin	GO:0010109	regulation_of_photosynthesis	GO:0010498	proteasomal_protein_catabolic_process	GO:0006006	glucose_metabolic_process
						GO:0009825	multidimensional_cell_growth					GO:0006814	sodium_ion_transport											GO:0009615	response_to_virus	GO:0009744	response_to_sucrose_stimulus	GO:0006790	sulfur_metabolic_process	GO:0006007	glucose_catabolic_process
						GO:0009827	plant-type_cell_wall_modification					GO:0015743	malate_transport											GO:0009850	auxin_metabolic_process	GO:0006808	regulation_of_nitrogen_utilization	GO:0015914	phospholipid_transport	GO:0006066	alcohol_metabolic_process
						GO:0009828	plant-type_cell_wall_loosening					GO:0000902	cell_morphogenesis											GO:0051607	defense_response_to_virus	GO:0009734	auxin_mediated_signaling_pathway	GO:0006914	autophagy	GO:0016052	carbohydrate_catabolic_process
						GO:0042545	cell_wall_modification					GO:0008361	regulation_of_cell_size											GO:0031348	negative_regulation_of_defense_response	GO:0009606	tropism	GO:0001666	response_to_hypoxia	GO:0019318	hexose_metabolic_process
						GO:0042547	cell_wall_modification_involved_in_multidimensional_cell_growth					GO:0009826	unidimensional_cell_growth											GO:0010118	stomatal_movement	GO:0009629	response_to_gravity			GO:0019320	hexose_catabolic_process
						GO:0010304	PSII_associated_light-harvesting_complex_II_catabolic_process					GO:0016049	cell_growth											GO:0010119	regulation_of_stomatal_movement	GO:0009630	gravitropism			GO:0006096	glycolysis
						GO:0006633	fatty_acid_biosynthetic_process					GO:0048589	developmental_growth											GO:0043069	negative_regulation_of_programmed_cell_death	GO:0010102	lateral_root_morphogenesis			GO:0009617	response_to_bacterium
						GO:0009734	auxin_mediated_signaling_pathway					GO:0009698	phenylpropanoid_metabolic_process											GO:0045730	respiratory_burst	GO:0009641	shade_avoidance			GO:0042742	defense_response_to_bacterium
						GO:0019374	galactolipid_metabolic_process					GO:0019748	secondary_metabolic_process											GO:0009612	response_to_mechanical_stimulus					GO:0051707	response_to_other_organism
						GO:0019375	galactolipid_biosynthetic_process					GO:0042398	cellular_amino_acid_derivative_biosynthetic_process											GO:0007568	aging					GO:0006790	sulfur_metabolic_process
						GO:0006790	sulfur_metabolic_process					GO:0048229	gametophyte_development											GO:0009407	toxin_catabolic_process					GO:0006081	cellular_aldehyde_metabolic_process
						GO:0009063	cellular_amino_acid_catabolic_process					GO:0010118	stomatal_movement											GO:0009700	indole_phytoalexin_biosynthetic_process					GO:0006544	glycine_metabolic_process
						GO:0005982	starch_metabolic_process					GO:0006006	glucose_metabolic_process											GO:0010120	camalexin_biosynthetic_process					GO:0009069	serine_family_amino_acid_metabolic_process
						GO:0019252	starch_biosynthetic_process					GO:0006007	glucose_catabolic_process											GO:0001666	response_to_hypoxia					GO:0006779	porphyrin_biosynthetic_process
						GO:0006808	regulation_of_nitrogen_utilization					GO:0006096	glycolysis											GO:0050688	regulation_of_defense_response_to_virus					GO:0015994	chlorophyll_metabolic_process
						GO:0009767	photosynthetic_electron_transport_chain					GO:0019318	hexose_metabolic_process											GO:0006568	tryptophan_metabolic_process					GO:0015995	chlorophyll_biosynthetic_process
						GO:0019684	photosynthesis,_light_reaction					GO:0019320	hexose_catabolic_process											GO:0009072	aromatic_amino_acid_family_metabolic_process					GO:0033014	tetrapyrrole_biosynthetic_process
						GO:0005986	sucrose_biosynthetic_process					GO:0009790	embryonic_development											GO:0009684	indoleacetic_acid_biosynthetic_process					GO:0019760	glucosinolate_metabolic_process
						GO:0009311	oligosaccharide_metabolic_process					GO:0009793	embryonic_development_ending_in_seed_dormancy											GO:0009851	auxin_biosynthetic_process					GO:0006090	pyruvate_metabolic_process
						GO:0009312	oligosaccharide_biosynthetic_process					GO:0009887	organ_morphogenesis											GO:0009062	fatty_acid_catabolic_process					GO:0006551	leucine_metabolic_process
						GO:0006021	inositol_biosynthetic_process					GO:0009942	longitudinal_axis_specification											GO:0019395	fatty_acid_oxidation					GO:0009081	branched_chain_family_amino_acid_metabolic_process
						GO:0009773	photosynthetic_electron_transport_in_photosystem_I					GO:0010016	shoot_morphogenesis											GO:0006817	phosphate_transport					GO:0009082	branched_chain_family_amino_acid_biosynthetic_process
						GO:0009823	cytokinin_catabolic_process					GO:0010154	fruit_development											GO:0046836	glycolipid_transport					GO:0009753	response_to_jasmonic_acid_stimulus
						GO:0009704	de-etiolation					GO:0048316	seed_development											GO:0009408	response_to_heat					GO:0005982	starch_metabolic_process
						GO:0009765	photosynthesis,_light_harvesting					GO:0042128	nitrate_assimilation											GO:0010310	regulation_of_hydrogen_peroxide_metabolic_process					GO:0009631	cold_acclimation
						GO:0010166	wax_metabolic_process					GO:0045036	protein_targeting_to_chloroplast											GO:0006862	nucleotide_transport					GO:0009765	photosynthesis,_light_harvesting
						GO:0010189	vitamin_E_biosynthetic_process					GO:0009294	DNA_mediated_transformation											GO:0015865	purine_nucleotide_transport					GO:0051258	protein_polymerization
						GO:0042362	fat-soluble_vitamin_biosynthetic_process					GO:0007010	cytoskeleton_organization											GO:0006560	proline_metabolic_process					GO:0000272	polysaccharide_catabolic_process
												GO:0009411	response_to_UV											GO:0006916	anti-apoptosis					GO:0009853	photorespiration
												GO:0009965	leaf_morphogenesis																	GO:0005983	starch_catabolic_process
												GO:0045010	actin_nucleation																	GO:0009767	photosynthetic_electron_transport_chain
												GO:0009926	auxin_polar_transport																	GO:0009773	photosynthetic_electron_transport_in_photosystem_I
												GO:0010103	stomatal_complex_morphogenesis																	GO:0015977	carbon_fixation
												GO:0048193	Golgi_vesicle_transport																	GO:0019253	reductive_pentose-phosphate_cycle
												GO:0006099	tricarboxylic_acid_cycle																	GO:0019685	photosynthesis,_dark_reaction
												GO:0015977	carbon_fixation																	GO:0010218	response_to_far_red_light
																														GO:0010109	regulation_of_photosynthesis
																														GO:0010205	photoinhibition
																														GO:0042548	regulation_of_photosynthesis,_light_reaction
																														GO:0006555	methionine_metabolic_process
																														GO:0006536	glutamate_metabolic_process
																														GO:0046500	S-adenosylmethionine_metabolic_process
																														GO:0009063	cellular_amino_acid_catabolic_process
																														GO:0010207	photosystem_II_assembly
																														GO:0042549	photosystem_II_stabilization

## Sheet: Sheet2
up-regulated go terms by TEV and TEV-At17
GO:0009617	response_to_bacterium
GO:0051707	response_to_other_organism
GO:0009407	toxin_catabolic_process
GO:0009636	response_to_toxin
GO:0006979	response_to_oxidative_stress
GO:0009737	response_to_abscisic_acid_stimulus
GO:0009605	response_to_external_stimulus
GO:0009642	response_to_light_intensity
GO:0006970	response_to_osmotic_stress
GO:0009266	response_to_temperature_stimulus
GO:0009651	response_to_salt_stress
GO:0042742	defense_response_to_bacterium
GO:0009620	response_to_fungus
GO:0050832	defense_response_to_fungus
GO:0001539	ciliary_or_flagellar_motility
GO:0009743	response_to_carbohydrate_stimulus
count 16
down-regulated go terms by TEV and TEV-At17
GO:0006725	cellular_aromatic_compound_metabolic_process
GO:0009698	phenylpropanoid_metabolic_process
GO:0019748	secondary_metabolic_process
GO:0006721	terpenoid_metabolic_process
GO:0008299	isoprenoid_biosynthetic_process
GO:0008610	lipid_biosynthetic_process
GO:0016114	terpenoid_biosynthetic_process
GO:0009314	response_to_radiation
GO:0009416	response_to_light_stimulus
GO:0010114	response_to_red_light
GO:0009737	response_to_abscisic_acid_stimulus
GO:0009733	response_to_auxin_stimulus
GO:0015979	photosynthesis
GO:0009250	glucan_biosynthetic_process
GO:0016051	carbohydrate_biosynthetic_process
GO:0006066	alcohol_metabolic_process
GO:0015977	carbon_fixation
GO:0019253	reductive_pentose-phosphate_cycle
GO:0019685	photosynthesis,_dark_reaction
GO:0009414	response_to_water_deprivation
GO:0009415	response_to_water
GO:0006631	fatty_acid_metabolic_process
GO:0009827	plant-type_cell_wall_modification
GO:0009828	plant-type_cell_wall_loosening
GO:0006633	fatty_acid_biosynthetic_process
GO:0009063	cellular_amino_acid_catabolic_process
GO:0005982	starch_metabolic_process
GO:0019252	starch_biosynthetic_process
GO:0009767	photosynthetic_electron_transport_chain
GO:0019684	photosynthesis,_light_reaction
GO:0006021	inositol_biosynthetic_process
GO:0009773	photosynthetic_electron_transport_in_photosystem_I
GO:0009765	photosynthesis,_light_harvesting
GO:0010166	wax_metabolic_process
GO:0010189	vitamin_E_biosynthetic_process
GO:0042362	fat-soluble_vitamin_biosynthetic_process
count 36
up-regulated go terms by TEV and TuMV
GO:0006979	response_to_oxidative_stress
GO:0009266	response_to_temperature_stimulus
GO:0009617	response_to_bacterium
GO:0009642	response_to_light_intensity
GO:0051707	response_to_other_organism
GO:0006970	response_to_osmotic_stress
GO:0009651	response_to_salt_stress
GO:0009409	response_to_cold
GO:0001539	ciliary_or_flagellar_motility
count 9
down-regulated go terms by TEV and TuMV
GO:0006631	fatty_acid_metabolic_process
GO:0006633	fatty_acid_biosynthetic_process
GO:0006970	response_to_osmotic_stress
GO:0009737	response_to_abscisic_acid_stimulus
GO:0010166	wax_metabolic_process
GO:0019748	secondary_metabolic_process
GO:0015979	photosynthesis
GO:0009414	response_to_water_deprivation
GO:0009415	response_to_water
GO:0016051	carbohydrate_biosynthetic_process
GO:0009767	photosynthetic_electron_transport_chain
GO:0009773	photosynthetic_electron_transport_in_photosystem_I
GO:0019684	photosynthesis,_light_reaction
GO:0005982	starch_metabolic_process
GO:0019252	starch_biosynthetic_process
count 15
up-regulated go terms by TEV and PPV
GO:0006970	response_to_osmotic_stress
GO:0009266	response_to_temperature_stimulus
GO:0009651	response_to_salt_stress
GO:0051707	response_to_other_organism
GO:0009409	response_to_cold
count 5
down-regulated go terms by TEV and PPV
count 0
up-regulated go terms by TEV and TMV
GO:0006970	response_to_osmotic_stress
GO:0006979	response_to_oxidative_stress
GO:0009651	response_to_salt_stress
GO:0009605	response_to_external_stimulus
GO:0009266	response_to_temperature_stimulus
GO:0009409	response_to_cold
GO:0009753	response_to_jasmonic_acid_stimulus
GO:0009617	response_to_bacterium
GO:0042742	defense_response_to_bacterium
GO:0051707	response_to_other_organism
GO:0009737	response_to_abscisic_acid_stimulus
GO:0045727	positive_regulation_of_translation
count 12
down-regulated go terms by TEV and TMV
count 0
up-regulated go terms by TEV and TRV
GO:0051707	response_to_other_organism
GO:0009617	response_to_bacterium
GO:0009266	response_to_temperature_stimulus
count 3
down-regulated go terms by TEV and TRV
GO:0006066	alcohol_metabolic_process
GO:0006725	cellular_aromatic_compound_metabolic_process
GO:0019748	secondary_metabolic_process
GO:0008610	lipid_biosynthetic_process
GO:0009698	phenylpropanoid_metabolic_process
count 5
up-regulated go terms by TEV and TCV
GO:0009620	response_to_fungus
GO:0051707	response_to_other_organism
GO:0006970	response_to_osmotic_stress
GO:0009651	response_to_salt_stress
GO:0009723	response_to_ethylene_stimulus
GO:0009737	response_to_abscisic_acid_stimulus
GO:0009753	response_to_jasmonic_acid_stimulus
GO:0009617	response_to_bacterium
GO:0010193	response_to_ozone
GO:0042742	defense_response_to_bacterium
GO:0009873	ethylene_mediated_signaling_pathway
GO:0006955	immune_response
GO:0009605	response_to_external_stimulus
GO:0009611	response_to_wounding
GO:0045727	positive_regulation_of_translation
GO:0006979	response_to_oxidative_stress
GO:0009626	plant-type_hypersensitive_response
GO:0031347	regulation_of_defense_response
GO:0034050	host_programmed_cell_death_induced_by_symbiont
GO:0045087	innate_immune_response
GO:0050832	defense_response_to_fungus
GO:0009266	response_to_temperature_stimulus
GO:0009409	response_to_cold
GO:0009743	response_to_carbohydrate_stimulus
GO:0010200	response_to_chitin
GO:0009636	response_to_toxin
GO:0051607	defense_response_to_virus
GO:0031348	negative_regulation_of_defense_response
GO:0009407	toxin_catabolic_process
count 29
down-regulated go terms by TEV and TCV
GO:0006631	fatty_acid_metabolic_process
GO:0006633	fatty_acid_biosynthetic_process
GO:0008610	lipid_biosynthetic_process
GO:0010166	wax_metabolic_process
GO:0009314	response_to_radiation
GO:0009416	response_to_light_stimulus
GO:0009637	response_to_blue_light
GO:0009698	phenylpropanoid_metabolic_process
GO:0019748	secondary_metabolic_process
GO:0015979	photosynthesis
GO:0019684	photosynthesis,_light_reaction
GO:0006066	alcohol_metabolic_process
GO:0009765	photosynthesis,_light_harvesting
GO:0010114	response_to_red_light
GO:0009767	photosynthetic_electron_transport_chain
GO:0009773	photosynthetic_electron_transport_in_photosystem_I
GO:0009827	plant-type_cell_wall_modification
GO:0009828	plant-type_cell_wall_loosening
GO:0015977	carbon_fixation
GO:0019253	reductive_pentose-phosphate_cycle
GO:0019685	photosynthesis,_dark_reaction
count 21
up-regulated go terms by TEV and CaLCuV
GO:0006955	immune_response
GO:0009605	response_to_external_stimulus
GO:0045087	innate_immune_response
GO:0051707	response_to_other_organism
GO:0006979	response_to_oxidative_stress
GO:0009266	response_to_temperature_stimulus
GO:0009636	response_to_toxin
GO:0006970	response_to_osmotic_stress
GO:0009617	response_to_bacterium
GO:0009651	response_to_salt_stress
GO:0042742	defense_response_to_bacterium
GO:0009620	response_to_fungus
GO:0050832	defense_response_to_fungus
GO:0009611	response_to_wounding
GO:0009753	response_to_jasmonic_acid_stimulus
GO:0051607	defense_response_to_virus
GO:0009743	response_to_carbohydrate_stimulus
GO:0010200	response_to_chitin
GO:0031347	regulation_of_defense_response
GO:0031348	negative_regulation_of_defense_response
count 20
down-regulated go terms by TEV and CaLCuV
GO:0015979	photosynthesis
GO:0009250	glucan_biosynthetic_process
GO:0016051	carbohydrate_biosynthetic_process
GO:0009314	response_to_radiation
GO:0009416	response_to_light_stimulus
GO:0009637	response_to_blue_light
GO:0006970	response_to_osmotic_stress
GO:0009414	response_to_water_deprivation
GO:0009415	response_to_water
GO:0009651	response_to_salt_stress
GO:0006631	fatty_acid_metabolic_process
GO:0006633	fatty_acid_biosynthetic_process
GO:0008610	lipid_biosynthetic_process
GO:0019684	photosynthesis,_light_reaction
GO:0009827	plant-type_cell_wall_modification
GO:0010114	response_to_red_light
GO:0019748	secondary_metabolic_process
GO:0009644	response_to_high_light_intensity
GO:0006066	alcohol_metabolic_process
GO:0005982	starch_metabolic_process
GO:0009765	photosynthesis,_light_harvesting
GO:0009767	photosynthetic_electron_transport_chain
GO:0009773	photosynthetic_electron_transport_in_photosystem_I
GO:0015977	carbon_fixation
GO:0019253	reductive_pentose-phosphate_cycle
GO:0019685	photosynthesis,_dark_reaction
GO:0009063	cellular_amino_acid_catabolic_process
count 27
up-regulated go terms by TEV-At17 and TuMV
GO:0006979	response_to_oxidative_stress
GO:0009266	response_to_temperature_stimulus
GO:0009408	response_to_heat
GO:0009617	response_to_bacterium
GO:0009642	response_to_light_intensity
GO:0010038	response_to_metal_ion
GO:0046686	response_to_cadmium_ion
GO:0051707	response_to_other_organism
GO:0019725	cellular_homeostasis
GO:0042254	ribosome_biogenesis
GO:0006970	response_to_osmotic_stress
GO:0009651	response_to_salt_stress
GO:0009627	systemic_acquired_resistance
GO:0001539	ciliary_or_flagellar_motility
count 14
down-regulated go terms by TEV-At17 and TuMV
GO:0006631	fatty_acid_metabolic_process
GO:0006633	fatty_acid_biosynthetic_process
GO:0009737	response_to_abscisic_acid_stimulus
GO:0010166	wax_metabolic_process
GO:0019748	secondary_metabolic_process
GO:0015979	photosynthesis
GO:0009414	response_to_water_deprivation
GO:0009415	response_to_water
GO:0006790	sulfur_metabolic_process
GO:0016051	carbohydrate_biosynthetic_process
GO:0009605	response_to_external_stimulus
GO:0009767	photosynthetic_electron_transport_chain
GO:0009773	photosynthetic_electron_transport_in_photosystem_I
GO:0019684	photosynthesis,_light_reaction
GO:0022900	electron_transport_chain
GO:0005982	starch_metabolic_process
GO:0006073	cellular_glucan_metabolic_process
GO:0009266	response_to_temperature_stimulus
GO:0009409	response_to_cold
GO:0019252	starch_biosynthetic_process
count 20
up-regulated go terms by TEV-At17 and PPV
GO:0005976	polysaccharide_metabolic_process
GO:0006970	response_to_osmotic_stress
GO:0009266	response_to_temperature_stimulus
GO:0009408	response_to_heat
GO:0009651	response_to_salt_stress
GO:0016051	carbohydrate_biosynthetic_process
GO:0051707	response_to_other_organism
GO:0009314	response_to_radiation
GO:0009416	response_to_light_stimulus
GO:0010038	response_to_metal_ion
GO:0046686	response_to_cadmium_ion
GO:0019748	secondary_metabolic_process
count 12
down-regulated go terms by TEV-At17 and PPV
GO:0045454	cell_redox_homeostasis
count 1
up-regulated go terms by TEV-At17 and TMV
GO:0006970	response_to_osmotic_stress
GO:0006979	response_to_oxidative_stress
GO:0009651	response_to_salt_stress
GO:0009605	response_to_external_stimulus
GO:0010038	response_to_metal_ion
GO:0019748	secondary_metabolic_process
GO:0046686	response_to_cadmium_ion
GO:0009266	response_to_temperature_stimulus
GO:0009314	response_to_radiation
GO:0009416	response_to_light_stimulus
GO:0000302	response_to_reactive_oxygen_species
GO:0009617	response_to_bacterium
GO:0042742	defense_response_to_bacterium
GO:0051707	response_to_other_organism
GO:0009737	response_to_abscisic_acid_stimulus
count 15
down-regulated go terms by TEV-At17 and TMV
count 0
up-regulated go terms by TEV-At17 and TRV
GO:0009627	systemic_acquired_resistance
GO:0051707	response_to_other_organism
GO:0009617	response_to_bacterium
GO:0010038	response_to_metal_ion
GO:0046686	response_to_cadmium_ion
GO:0009266	response_to_temperature_stimulus
count 6
down-regulated go terms by TEV-At17 and TRV
GO:0006066	alcohol_metabolic_process
GO:0006725	cellular_aromatic_compound_metabolic_process
GO:0019748	secondary_metabolic_process
GO:0006520	cellular_amino_acid_metabolic_process
GO:0008610	lipid_biosynthetic_process
GO:0006779	porphyrin_biosynthetic_process
GO:0015994	chlorophyll_metabolic_process
GO:0015995	chlorophyll_biosynthetic_process
GO:0033014	tetrapyrrole_biosynthetic_process
GO:0016042	lipid_catabolic_process
GO:0009698	phenylpropanoid_metabolic_process
GO:0009699	phenylpropanoid_biosynthetic_process
count 12
up-regulated go terms by TEV-At17 and TCV
GO:0019725	cellular_homeostasis
GO:0009620	response_to_fungus
GO:0051707	response_to_other_organism
GO:0006970	response_to_osmotic_stress
GO:0009651	response_to_salt_stress
GO:0009737	response_to_abscisic_acid_stimulus
GO:0010038	response_to_metal_ion
GO:0046686	response_to_cadmium_ion
GO:0009617	response_to_bacterium
GO:0042742	defense_response_to_bacterium
GO:0009605	response_to_external_stimulus
GO:0000302	response_to_reactive_oxygen_species
GO:0006979	response_to_oxidative_stress
GO:0019748	secondary_metabolic_process
GO:0009627	systemic_acquired_resistance
GO:0050832	defense_response_to_fungus
GO:0009266	response_to_temperature_stimulus
GO:0009743	response_to_carbohydrate_stimulus
GO:0009636	response_to_toxin
GO:0007568	aging
GO:0009407	toxin_catabolic_process
GO:0009408	response_to_heat
count 22
down-regulated go terms by TEV-At17 and TCV
GO:0006631	fatty_acid_metabolic_process
GO:0006633	fatty_acid_biosynthetic_process
GO:0008610	lipid_biosynthetic_process
GO:0010166	wax_metabolic_process
GO:0009314	response_to_radiation
GO:0009416	response_to_light_stimulus
GO:0009605	response_to_external_stimulus
GO:0009639	response_to_red_or_far_red_light
GO:0006779	porphyrin_biosynthetic_process
GO:0033014	tetrapyrrole_biosynthetic_process
GO:0009266	response_to_temperature_stimulus
GO:0009409	response_to_cold
GO:0022900	electron_transport_chain
GO:0005976	polysaccharide_metabolic_process
GO:0009698	phenylpropanoid_metabolic_process
GO:0009699	phenylpropanoid_biosynthetic_process
GO:0009825	multidimensional_cell_growth
GO:0019748	secondary_metabolic_process
GO:0015979	photosynthesis
GO:0019684	photosynthesis,_light_reaction
GO:0006066	alcohol_metabolic_process
GO:0009765	photosynthesis,_light_harvesting
GO:0015994	chlorophyll_metabolic_process
GO:0015995	chlorophyll_biosynthetic_process
GO:0010114	response_to_red_light
GO:0016042	lipid_catabolic_process
GO:0006073	cellular_glucan_metabolic_process
GO:0007047	cellular_cell_wall_organization
GO:0006520	cellular_amino_acid_metabolic_process
GO:0009767	photosynthetic_electron_transport_chain
GO:0009773	photosynthetic_electron_transport_in_photosystem_I
GO:0006949	syncytium_formation
GO:0009306	protein_secretion
GO:0009664	plant-type_cell_wall_organization
GO:0009827	plant-type_cell_wall_modification
GO:0009828	plant-type_cell_wall_loosening
GO:0042545	cell_wall_modification
GO:0042547	cell_wall_modification_involved_in_multidimensional_cell_growth
GO:0048589	developmental_growth
GO:0015977	carbon_fixation
GO:0019253	reductive_pentose-phosphate_cycle
GO:0019685	photosynthesis,_dark_reaction
GO:0006808	regulation_of_nitrogen_utilization
GO:0009734	auxin_mediated_signaling_pathway
count 44
up-regulated go terms by TEV-At17 and CaLCuV
GO:0009605	response_to_external_stimulus
GO:0009627	systemic_acquired_resistance
GO:0051707	response_to_other_organism
GO:0006979	response_to_oxidative_stress
GO:0009266	response_to_temperature_stimulus
GO:0009636	response_to_toxin
GO:0019748	secondary_metabolic_process
GO:0006970	response_to_osmotic_stress
GO:0009617	response_to_bacterium
GO:0009651	response_to_salt_stress
GO:0010038	response_to_metal_ion
GO:0042742	defense_response_to_bacterium
GO:0046686	response_to_cadmium_ion
GO:0009620	response_to_fungus
GO:0019725	cellular_homeostasis
GO:0050832	defense_response_to_fungus
GO:0009314	response_to_radiation
GO:0009416	response_to_light_stimulus
GO:0000302	response_to_reactive_oxygen_species
GO:0009743	response_to_carbohydrate_stimulus
GO:0007568	aging
GO:0009408	response_to_heat
count 22
down-regulated go terms by TEV-At17 and CaLCuV
GO:0045454	cell_redox_homeostasis
GO:0015979	photosynthesis
GO:0005976	polysaccharide_metabolic_process
GO:0006073	cellular_glucan_metabolic_process
GO:0007047	cellular_cell_wall_organization
GO:0009250	glucan_biosynthetic_process
GO:0016051	carbohydrate_biosynthetic_process
GO:0009314	response_to_radiation
GO:0009416	response_to_light_stimulus
GO:0009605	response_to_external_stimulus
GO:0009414	response_to_water_deprivation
GO:0009415	response_to_water
GO:0006631	fatty_acid_metabolic_process
GO:0006633	fatty_acid_biosynthetic_process
GO:0008610	lipid_biosynthetic_process
GO:0006520	cellular_amino_acid_metabolic_process
GO:0019684	photosynthesis,_light_reaction
GO:0022900	electron_transport_chain
GO:0008361	regulation_of_cell_size
GO:0009825	multidimensional_cell_growth
GO:0009827	plant-type_cell_wall_modification
GO:0009266	response_to_temperature_stimulus
GO:0009409	response_to_cold
GO:0009639	response_to_red_or_far_red_light
GO:0010114	response_to_red_light
GO:0016116	carotenoid_metabolic_process
GO:0019748	secondary_metabolic_process
GO:0006066	alcohol_metabolic_process
GO:0006790	sulfur_metabolic_process
GO:0006779	porphyrin_biosynthetic_process
GO:0015994	chlorophyll_metabolic_process
GO:0015995	chlorophyll_biosynthetic_process
GO:0033014	tetrapyrrole_biosynthetic_process
GO:0005982	starch_metabolic_process
GO:0009765	photosynthesis,_light_harvesting
GO:0009767	photosynthetic_electron_transport_chain
GO:0009773	photosynthetic_electron_transport_in_photosystem_I
GO:0015977	carbon_fixation
GO:0019253	reductive_pentose-phosphate_cycle
GO:0019685	photosynthesis,_dark_reaction
GO:0009063	cellular_amino_acid_catabolic_process
count 41
up-regulated go terms by TuMV and PPV
GO:0006970	response_to_osmotic_stress
GO:0009266	response_to_temperature_stimulus
GO:0009408	response_to_heat
GO:0009651	response_to_salt_stress
GO:0051707	response_to_other_organism
GO:0009409	response_to_cold
GO:0010038	response_to_metal_ion
GO:0046686	response_to_cadmium_ion
GO:0006457	protein_folding
GO:0006396	RNA_processing
GO:0009790	embryonic_development
GO:0009793	embryonic_development_ending_in_seed_dormancy
GO:0010154	fruit_development
GO:0048316	seed_development
count 14
down-regulated go terms by TuMV and PPV
count 0
up-regulated go terms by TuMV and TMV
GO:0006970	response_to_osmotic_stress
GO:0006979	response_to_oxidative_stress
GO:0009651	response_to_salt_stress
GO:0010038	response_to_metal_ion
GO:0046686	response_to_cadmium_ion
GO:0009266	response_to_temperature_stimulus
GO:0009409	response_to_cold
GO:0009617	response_to_bacterium
GO:0051707	response_to_other_organism
count 9
down-regulated go terms by TuMV and TMV
count 0
up-regulated go terms by TuMV and TRV
GO:0009627	systemic_acquired_resistance
GO:0051707	response_to_other_organism
GO:0009617	response_to_bacterium
GO:0010038	response_to_metal_ion
GO:0046686	response_to_cadmium_ion
GO:0009266	response_to_temperature_stimulus
count 6
down-regulated go terms by TuMV and TRV
GO:0019748	secondary_metabolic_process
count 1
up-regulated go terms by TuMV and TCV
GO:0019725	cellular_homeostasis
GO:0051707	response_to_other_organism
GO:0006970	response_to_osmotic_stress
GO:0009651	response_to_salt_stress
GO:0010038	response_to_metal_ion
GO:0046686	response_to_cadmium_ion
GO:0006457	protein_folding
GO:0009617	response_to_bacterium
GO:0006979	response_to_oxidative_stress
GO:0009627	systemic_acquired_resistance
GO:0034976	response_to_endoplasmic_reticulum_stress
GO:0009266	response_to_temperature_stimulus
GO:0009409	response_to_cold
GO:0009408	response_to_heat
count 14
down-regulated go terms by TuMV and TCV
GO:0006631	fatty_acid_metabolic_process
GO:0006633	fatty_acid_biosynthetic_process
GO:0010166	wax_metabolic_process
GO:0009605	response_to_external_stimulus
GO:0009266	response_to_temperature_stimulus
GO:0009409	response_to_cold
GO:0022900	electron_transport_chain
GO:0019748	secondary_metabolic_process
GO:0015979	photosynthesis
GO:0019684	photosynthesis,_light_reaction
GO:0006073	cellular_glucan_metabolic_process
GO:0006869	lipid_transport
GO:0009767	photosynthetic_electron_transport_chain
GO:0009773	photosynthetic_electron_transport_in_photosystem_I
count 14
up-regulated go terms by TuMV and CaLCuV
GO:0009627	systemic_acquired_resistance
GO:0051707	response_to_other_organism
GO:0006979	response_to_oxidative_stress
GO:0009266	response_to_temperature_stimulus
GO:0006970	response_to_osmotic_stress
GO:0009617	response_to_bacterium
GO:0009651	response_to_salt_stress
GO:0010038	response_to_metal_ion
GO:0046686	response_to_cadmium_ion
GO:0019725	cellular_homeostasis
GO:0034976	response_to_endoplasmic_reticulum_stress
GO:0006457	protein_folding
GO:0009408	response_to_heat
count 13
down-regulated go terms by TuMV and CaLCuV
GO:0015979	photosynthesis
GO:0006073	cellular_glucan_metabolic_process
GO:0016051	carbohydrate_biosynthetic_process
GO:0006869	lipid_transport
GO:0009605	response_to_external_stimulus
GO:0006970	response_to_osmotic_stress
GO:0009414	response_to_water_deprivation
GO:0009415	response_to_water
GO:0006631	fatty_acid_metabolic_process
GO:0006633	fatty_acid_biosynthetic_process
GO:0019684	photosynthesis,_light_reaction
GO:0022900	electron_transport_chain
GO:0006972	hyperosmotic_response
GO:0009266	response_to_temperature_stimulus
GO:0009409	response_to_cold
GO:0042538	hyperosmotic_salinity_response
GO:0019748	secondary_metabolic_process
GO:0006790	sulfur_metabolic_process
GO:0019760	glucosinolate_metabolic_process
GO:0005982	starch_metabolic_process
GO:0009631	cold_acclimation
GO:0005983	starch_catabolic_process
GO:0009767	photosynthetic_electron_transport_chain
GO:0009773	photosynthetic_electron_transport_in_photosystem_I
count 24
up-regulated go terms by PPV and TMV
GO:0006970	response_to_osmotic_stress
GO:0009651	response_to_salt_stress
GO:0006520	cellular_amino_acid_metabolic_process
GO:0008652	cellular_amino_acid_biosynthetic_process
GO:0010038	response_to_metal_ion
GO:0016052	carbohydrate_catabolic_process
GO:0019748	secondary_metabolic_process
GO:0046686	response_to_cadmium_ion
GO:0009266	response_to_temperature_stimulus
GO:0009314	response_to_radiation
GO:0009409	response_to_cold
GO:0009416	response_to_light_stimulus
GO:0009415	response_to_water
GO:0051707	response_to_other_organism
GO:0006006	glucose_metabolic_process
GO:0006007	glucose_catabolic_process
GO:0006096	glycolysis
GO:0019318	hexose_metabolic_process
GO:0019320	hexose_catabolic_process
GO:0048193	Golgi_vesicle_transport
count 20
down-regulated go terms by PPV and TMV
count 0
up-regulated go terms by PPV and TRV
GO:0051707	response_to_other_organism
GO:0016052	carbohydrate_catabolic_process
GO:0010038	response_to_metal_ion
GO:0046686	response_to_cadmium_ion
GO:0006006	glucose_metabolic_process
GO:0006007	glucose_catabolic_process
GO:0019320	hexose_catabolic_process
GO:0009266	response_to_temperature_stimulus
count 8
down-regulated go terms by PPV and TRV
count 0
up-regulated go terms by PPV and TCV
GO:0006520	cellular_amino_acid_metabolic_process
GO:0042398	cellular_amino_acid_derivative_biosynthetic_process
GO:0051707	response_to_other_organism
GO:0006970	response_to_osmotic_stress
GO:0009651	response_to_salt_stress
GO:0010038	response_to_metal_ion
GO:0046686	response_to_cadmium_ion
GO:0006457	protein_folding
GO:0008652	cellular_amino_acid_biosynthetic_process
GO:0009411	response_to_UV
GO:0019748	secondary_metabolic_process
GO:0009266	response_to_temperature_stimulus
GO:0009409	response_to_cold
GO:0009415	response_to_water
GO:0010118	stomatal_movement
GO:0009408	response_to_heat
count 16
down-regulated go terms by PPV and TCV
count 0
up-regulated go terms by PPV and CaLCuV
GO:0051707	response_to_other_organism
GO:0016052	carbohydrate_catabolic_process
GO:0009266	response_to_temperature_stimulus
GO:0019748	secondary_metabolic_process
GO:0006970	response_to_osmotic_stress
GO:0009651	response_to_salt_stress
GO:0010038	response_to_metal_ion
GO:0046686	response_to_cadmium_ion
GO:0009314	response_to_radiation
GO:0009416	response_to_light_stimulus
GO:0042398	cellular_amino_acid_derivative_biosynthetic_process
GO:0006457	protein_folding
GO:0019318	hexose_metabolic_process
GO:0006007	glucose_catabolic_process
GO:0019320	hexose_catabolic_process
GO:0009408	response_to_heat
GO:0007049	cell_cycle
count 17
down-regulated go terms by PPV and CaLCuV
GO:0006979	response_to_oxidative_stress
GO:0019725	cellular_homeostasis
GO:0045454	cell_redox_homeostasis
GO:0009642	response_to_light_intensity
count 4
up-regulated go terms by TMV and TRV
GO:0051707	response_to_other_organism
GO:0009617	response_to_bacterium
GO:0016052	carbohydrate_catabolic_process
GO:0010038	response_to_metal_ion
GO:0046686	response_to_cadmium_ion
GO:0006006	glucose_metabolic_process
GO:0006007	glucose_catabolic_process
GO:0019320	hexose_catabolic_process
GO:0009266	response_to_temperature_stimulus
count 9
down-regulated go terms by TMV and TRV
count 0
up-regulated go terms by TMV and TCV
GO:0006520	cellular_amino_acid_metabolic_process
GO:0006790	sulfur_metabolic_process
GO:0051707	response_to_other_organism
GO:0006970	response_to_osmotic_stress
GO:0009651	response_to_salt_stress
GO:0009737	response_to_abscisic_acid_stimulus
GO:0009753	response_to_jasmonic_acid_stimulus
GO:0010038	response_to_metal_ion
GO:0046686	response_to_cadmium_ion
GO:0009617	response_to_bacterium
GO:0042742	defense_response_to_bacterium
GO:0008652	cellular_amino_acid_biosynthetic_process
GO:0009605	response_to_external_stimulus
GO:0045727	positive_regulation_of_translation
GO:0000302	response_to_reactive_oxygen_species
GO:0006979	response_to_oxidative_stress
GO:0019748	secondary_metabolic_process
GO:0009867	jasmonic_acid_mediated_signaling_pathway
GO:0009266	response_to_temperature_stimulus
GO:0009409	response_to_cold
GO:0009414	response_to_water_deprivation
GO:0009415	response_to_water
count 22
down-regulated go terms by TMV and TCV
count 0
up-regulated go terms by TMV and CaLCuV
GO:0009605	response_to_external_stimulus
GO:0051707	response_to_other_organism
GO:0006979	response_to_oxidative_stress
GO:0016052	carbohydrate_catabolic_process
GO:0009266	response_to_temperature_stimulus
GO:0019748	secondary_metabolic_process
GO:0006970	response_to_osmotic_stress
GO:0009617	response_to_bacterium
GO:0009651	response_to_salt_stress
GO:0010038	response_to_metal_ion
GO:0042742	defense_response_to_bacterium
GO:0046686	response_to_cadmium_ion
GO:0009314	response_to_radiation
GO:0009416	response_to_light_stimulus
GO:0000302	response_to_reactive_oxygen_species
GO:0009753	response_to_jasmonic_acid_stimulus
GO:0006623	protein_targeting_to_vacuole
GO:0019318	hexose_metabolic_process
GO:0006007	glucose_catabolic_process
GO:0019320	hexose_catabolic_process
GO:0009117	nucleotide_metabolic_process
GO:0006790	sulfur_metabolic_process
count 22
down-regulated go terms by TMV and CaLCuV
count 0
up-regulated go terms by TRV and TCV
GO:0051707	response_to_other_organism
GO:0010038	response_to_metal_ion
GO:0046686	response_to_cadmium_ion
GO:0009617	response_to_bacterium
GO:0009627	systemic_acquired_resistance
GO:0009266	response_to_temperature_stimulus
GO:0009850	auxin_metabolic_process
GO:0006916	anti-apoptosis
count 8
down-regulated go terms by TRV and TCV
GO:0008610	lipid_biosynthetic_process
GO:0006779	porphyrin_biosynthetic_process
GO:0033014	tetrapyrrole_biosynthetic_process
GO:0009698	phenylpropanoid_metabolic_process
GO:0009699	phenylpropanoid_biosynthetic_process
GO:0019748	secondary_metabolic_process
GO:0009617	response_to_bacterium
GO:0042742	defense_response_to_bacterium
GO:0051707	response_to_other_organism
GO:0006066	alcohol_metabolic_process
GO:0015994	chlorophyll_metabolic_process
GO:0015995	chlorophyll_biosynthetic_process
GO:0016042	lipid_catabolic_process
GO:0006520	cellular_amino_acid_metabolic_process
count 14
up-regulated go terms by TRV and CaLCuV
GO:0009627	systemic_acquired_resistance
GO:0051707	response_to_other_organism
GO:0016052	carbohydrate_catabolic_process
GO:0009266	response_to_temperature_stimulus
GO:0009617	response_to_bacterium
GO:0010038	response_to_metal_ion
GO:0046686	response_to_cadmium_ion
GO:0006007	glucose_catabolic_process
GO:0019320	hexose_catabolic_process
count 9
down-regulated go terms by TRV and CaLCuV
GO:0010038	response_to_metal_ion
GO:0045036	protein_targeting_to_chloroplast
GO:0009657	plastid_organization
GO:0009658	chloroplast_organization
GO:0008610	lipid_biosynthetic_process
GO:0006520	cellular_amino_acid_metabolic_process
GO:0006457	protein_folding
GO:0019748	secondary_metabolic_process
GO:0046686	response_to_cadmium_ion
GO:0006066	alcohol_metabolic_process
GO:0009617	response_to_bacterium
GO:0042742	defense_response_to_bacterium
GO:0051707	response_to_other_organism
GO:0006779	porphyrin_biosynthetic_process
GO:0015994	chlorophyll_metabolic_process
GO:0015995	chlorophyll_biosynthetic_process
GO:0033014	tetrapyrrole_biosynthetic_process
count 17
up-regulated go terms by TCV and CaLCuV
GO:0006955	immune_response
GO:0009605	response_to_external_stimulus
GO:0009627	systemic_acquired_resistance
GO:0009814	defense_response,_incompatible_interaction
GO:0045087	innate_immune_response
GO:0051707	response_to_other_organism
GO:0006979	response_to_oxidative_stress
GO:0009266	response_to_temperature_stimulus
GO:0009636	response_to_toxin
GO:0019748	secondary_metabolic_process
GO:0006970	response_to_osmotic_stress
GO:0009617	response_to_bacterium
GO:0009651	response_to_salt_stress
GO:0010038	response_to_metal_ion
GO:0042742	defense_response_to_bacterium
GO:0046686	response_to_cadmium_ion
GO:0007166	cell_surface_receptor_linked_signaling_pathway
GO:0009620	response_to_fungus
GO:0019725	cellular_homeostasis
GO:0045454	cell_redox_homeostasis
GO:0050832	defense_response_to_fungus
GO:0009751	response_to_salicylic_acid_stimulus
GO:0000302	response_to_reactive_oxygen_species
GO:0009611	response_to_wounding
GO:0009753	response_to_jasmonic_acid_stimulus
GO:0009615	response_to_virus
GO:0051607	defense_response_to_virus
GO:0009743	response_to_carbohydrate_stimulus
GO:0010200	response_to_chitin
GO:0008219	cell_death
GO:0012501	programmed_cell_death
GO:0034976	response_to_endoplasmic_reticulum_stress
GO:0009863	salicylic_acid_mediated_signaling_pathway
GO:0031347	regulation_of_defense_response
GO:0006725	cellular_aromatic_compound_metabolic_process
GO:0007568	aging
GO:0042398	cellular_amino_acid_derivative_biosynthetic_process
GO:0006457	protein_folding
GO:0009408	response_to_heat
GO:0031348	negative_regulation_of_defense_response
GO:0009062	fatty_acid_catabolic_process
GO:0019395	fatty_acid_oxidation
GO:0006790	sulfur_metabolic_process
GO:0001666	response_to_hypoxia
count 44
down-regulated go terms by TCV and CaLCuV
GO:0015979	photosynthesis
GO:0005976	polysaccharide_metabolic_process
GO:0006073	cellular_glucan_metabolic_process
GO:0007047	cellular_cell_wall_organization
GO:0006869	lipid_transport
GO:0009314	response_to_radiation
GO:0009416	response_to_light_stimulus
GO:0009605	response_to_external_stimulus
GO:0009637	response_to_blue_light
GO:0006631	fatty_acid_metabolic_process
GO:0006633	fatty_acid_biosynthetic_process
GO:0008610	lipid_biosynthetic_process
GO:0006520	cellular_amino_acid_metabolic_process
GO:0019684	photosynthesis,_light_reaction
GO:0022900	electron_transport_chain
GO:0009825	multidimensional_cell_growth
GO:0009827	plant-type_cell_wall_modification
GO:0006461	protein_complex_assembly
GO:0009266	response_to_temperature_stimulus
GO:0009409	response_to_cold
GO:0009639	response_to_red_or_far_red_light
GO:0010114	response_to_red_light
GO:0019748	secondary_metabolic_process
GO:0006006	glucose_metabolic_process
GO:0006007	glucose_catabolic_process
GO:0006066	alcohol_metabolic_process
GO:0016052	carbohydrate_catabolic_process
GO:0019318	hexose_metabolic_process
GO:0019320	hexose_catabolic_process
GO:0006096	glycolysis
GO:0009617	response_to_bacterium
GO:0042742	defense_response_to_bacterium
GO:0051707	response_to_other_organism
GO:0006544	glycine_metabolic_process
GO:0006779	porphyrin_biosynthetic_process
GO:0015994	chlorophyll_metabolic_process
GO:0015995	chlorophyll_biosynthetic_process
GO:0033014	tetrapyrrole_biosynthetic_process
GO:0009753	response_to_jasmonic_acid_stimulus
GO:0009765	photosynthesis,_light_harvesting
GO:0009853	photorespiration
GO:0009767	photosynthetic_electron_transport_chain
GO:0009773	photosynthetic_electron_transport_in_photosystem_I
GO:0015977	carbon_fixation
GO:0019253	reductive_pentose-phosphate_cycle
GO:0019685	photosynthesis,_dark_reaction
GO:0010218	response_to_far_red_light
GO:0010109	regulation_of_photosynthesis
count 48

## Sheet: Sheet3
Over-represented GO terms in Potyvirus (at least 3 of 4)
ciliary_or_flagellar_motility
response_to_osmotic_stress
response_to_oxidative_stress
response_to_temperature_stimulus
response_to_heat
response_to_cold
response_to_bacterium
response_to_light_intensity
response_to_salt_stress
response_to_metal_ion
response_to_cadmium_ion
response_to_other_organism
Under-represented GO terms in Potyvirus (at least 3 of 4)
starch_metabolic_process
fatty_acid_metabolic_process
fatty_acid_biosynthetic_process
response_to_water_deprivation
response_to_water
response_to_abscisic_acid_stimulus
photosynthetic_electron_transport_chain
photosynthetic_electron_transport_in_photosystem_I
wax_metabolic_process
photosynthesis
carbohydrate_biosynthetic_process
starch_biosynthetic_process
photosynthesis,_light_reaction
secondary_metabolic_process
Over-represented GO terms in Brasica-like Virus (at least 3 of 4)
response_to_reactive_oxygen_species
protein_folding
response_to_osmotic_stress
response_to_oxidative_stress
aging
response_to_temperature_stimulus
response_to_heat
response_to_external_stimulus
response_to_bacterium
response_to_fungus
systemic_acquired_resistance
response_to_toxin
response_to_salt_stress
response_to_carbohydrate_stimulus
response_to_metal_ion
cellular_homeostasis
secondary_metabolic_process
response_to_endoplasmic_reticulum_stress
defense_response_to_bacterium
response_to_cadmium_ion
defense_response_to_fungus
response_to_other_organism
Under-represented GO terms in Brasica-like Virus (at least 3 of 4)
polysaccharide_metabolic_process
starch_metabolic_process
alcohol_metabolic_process
cellular_glucan_metabolic_process
cellular_amino_acid_metabolic_process
fatty_acid_metabolic_process
fatty_acid_biosynthetic_process
porphyrin_biosynthetic_process
sulfur_metabolic_process
lipid_transport
cellular_cell_wall_organization
lipid_biosynthetic_process
response_to_temperature_stimulus
response_to_radiation
response_to_cold
response_to_water_deprivation
response_to_water
response_to_light_stimulus
response_to_external_stimulus
response_to_red_or_far_red_light
photosynthesis,_light_harvesting
photosynthetic_electron_transport_chain
photosynthetic_electron_transport_in_photosystem_I
multidimensional_cell_growth
plant-type_cell_wall_modification
response_to_red_light
wax_metabolic_process
carbon_fixation
photosynthesis
chlorophyll_metabolic_process
chlorophyll_biosynthetic_process
carbohydrate_biosynthetic_process
reductive_pentose-phosphate_cycle
photosynthesis,_light_reaction
photosynthesis,_dark_reaction
secondary_metabolic_process
electron_transport_chain
tetrapyrrole_biosynthetic_process
Over-represented GO terms in Plant Virus (at least 5 of 8)
response_to_heat
response_to_cold
response_to_external_stimulus
systemic_acquired_resistance
secondary_metabolic_process
defense_response_to_bacterium
response_to_oxidative_stress
response_to_osmotic_stress
response_to_bacterium
response_to_salt_stress
response_to_metal_ion
response_to_cadmium_ion
response_to_temperature_stimulus
response_to_other_organism
Under-represented GO terms in Plant Virus (at least 5 of 8)
alcohol_metabolic_process
fatty_acid_metabolic_process
fatty_acid_biosynthetic_process
lipid_biosynthetic_process
photosynthetic_electron_transport_chain
photosynthetic_electron_transport_in_photosystem_I
photosynthesis
photosynthesis,_light_reaction
secondary_metabolic_process

## Sheet: Sheet4
up	TEV	TEV-At17	TuMV	PPV	TMV	TRV	TCV	CaLCuV
TEV	35	16	9	5	12	3	29	20
TEV-At17		32	14	12	15	6	22	22
TuMV			29	14	9	6	14	13
PPV				98	20	8	16	17
TMV					62	9	22	22
TRV						14	8	9
TCV							91	44
CaLCuV								66
down	TEV	TEV-At17	TuMV	PPV	TMV	TRV	TCV	CaLCuV
TEV	41	36	15	0	0	5	21	27
TEV-At17		90	20	1	0	12	44	41
TuMV			30	0	0	1	14	24
PPV				8	0	0	0	4
TMV					0	0	0	0
TRV						26	14	17
TCV							70	48
CaLCuV								107
total	TEV	TEV-At17	TuMV	PPV	TMV	TRV	TCV	CaLCuV
TEV	76	52	24	5	12	8	50	47
TEV-At17		122	34	13	15	18	66	63
TuMV			59	14	9	7	28	37
PPV				106	20	8	16	21
TMV					62	9	22	22
TRV						40	22	26
TCV							161	92
CaLCuV								173
corr	TEV	TEV-At17	TuMV	PPV	TMV	TRV	TCV	CaLCuV
TEV	1	0.525253	0.355556	0.0549451	0.173913	0.137931	0.421941	0.37751
TEV-At17		1	0.375691	0.114035	0.163043	0.222222	0.466431	0.427119
TuMV			1	0.169697	0.14876	0.141414	0.254545	0.318966
PPV				1	0.238095	0.109589	0.11985	0.150538
TMV					1	0.176471	0.197309	0.187234
TRV						1	0.218905	0.244131
TCV							1	0.550898
CaLCuV								1
